# Supplementary material
Source: PubMed Central journal article supplement (PMC4149825)

## SUPPLEMENTARY DATA

### **‘Carba’-carfentanil (*trans* isomer): a $\mu$ opioid receptor (MOR) partial agonist with a distinct binding mode**

Grazyna Weltrowska<sup>a</sup>, Carole Lemieux<sup>a</sup>, Nga N. Chung<sup>a</sup>, Jason J. Guo<sup>c</sup>,  
Brian C. Wilkes<sup>a</sup>, Peter W. Schiller<sup>a,b</sup>

<sup>a</sup>*Laboratory of Chemical Biology and Peptide Research, Clinical Research Institute of Montreal, 110 Pine Avenue West, Montreal, QC, Canada H2W 1R7*

<sup>b</sup>*Department of Pharmacology, Université de Montréal, Montréal, QC, Canada H3C 3J7*

<sup>c</sup>*Center for Drug Discovery, Northeastern University, 360 Huntington Avenue, Boston, Massachusetts 02115, USA*

### **Stereochemical assignment of compounds **8a** and **8b****

Resonance assignments were based on 2D <sup>1</sup>H-<sup>1</sup>H COSY and NOESY as well as <sup>1</sup>H-<sup>13</sup>C HSQC correlation spectra. The two isomers have very different NOE patterns between aromatic protons and those on the cyclohexane ring. From this, it can be concluded that isomer **8a** is *cis* and isomer **8b** is *trans*.

Table 1 Proton and carbon-13 resonance assignments of compounds **8a** and **8b**

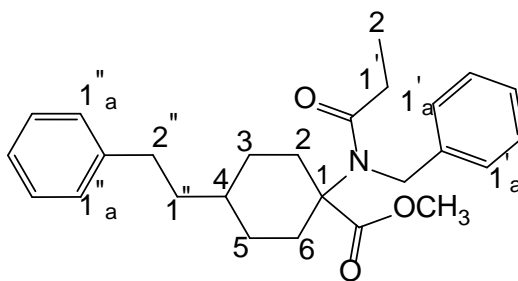

|                   | <b>8a</b>      |                 | <b>8b</b>      |                 |
|-------------------|----------------|-----------------|----------------|-----------------|
|                   | <sup>1</sup> H | <sup>13</sup> C | <sup>1</sup> H | <sup>13</sup> C |
| 4                 | 1.26           | 34.18           | 1.07           | 35.65           |
| 3,5a              | 0.90           | 26.55           | 1.28           | 28.46           |
| 3,5e              | 1.46           | 26.55           | 1.58           | 28.46           |
| 2,6a              | 1.72           | 30.81           | 1.13           | 33.27           |
| 2,6e              | 2.06           | 30.81           | 2.17           | 33.27           |
| 2'                | 0.81           | 9.12            | 0.82           | 9.12            |
| 1'                | 1.80           | 28.21           | 1.74           | 28.21           |
| 1' <sub>a</sub>   | 7.50           | 130.93          | 7.30           | 130.13          |
| -OCH <sub>3</sub> | 3.64           | 52.00           | 3.64           | 51.44           |
| 2''               | 2.47           | 32.46           | 2.51           | 32.42           |
| 1''               | 1.35           | 37.26           | 1.40           | 38.10           |
| 1'' <sub>a</sub>  | 7.12           | 128.08          | 7.13           | 127.99          |

Figure 1. 1-D  $^1\text{H}$  NMR spectra of compounds **8a** and **8b**

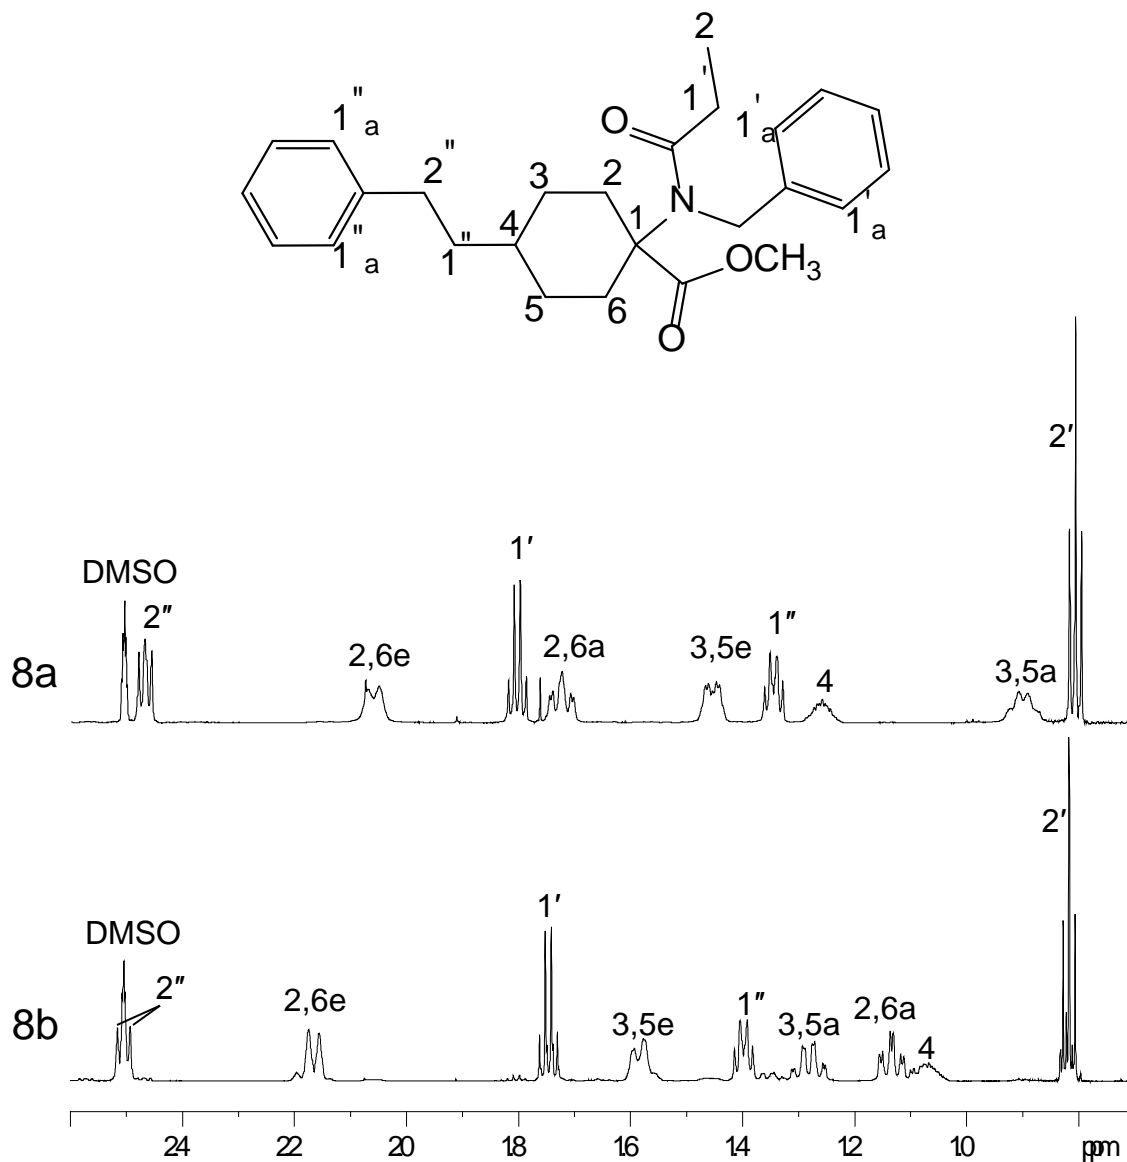

Figure 2.  $^1\text{H}$ - $^1\text{H}$  COSY spectra of **8a** and **8b**

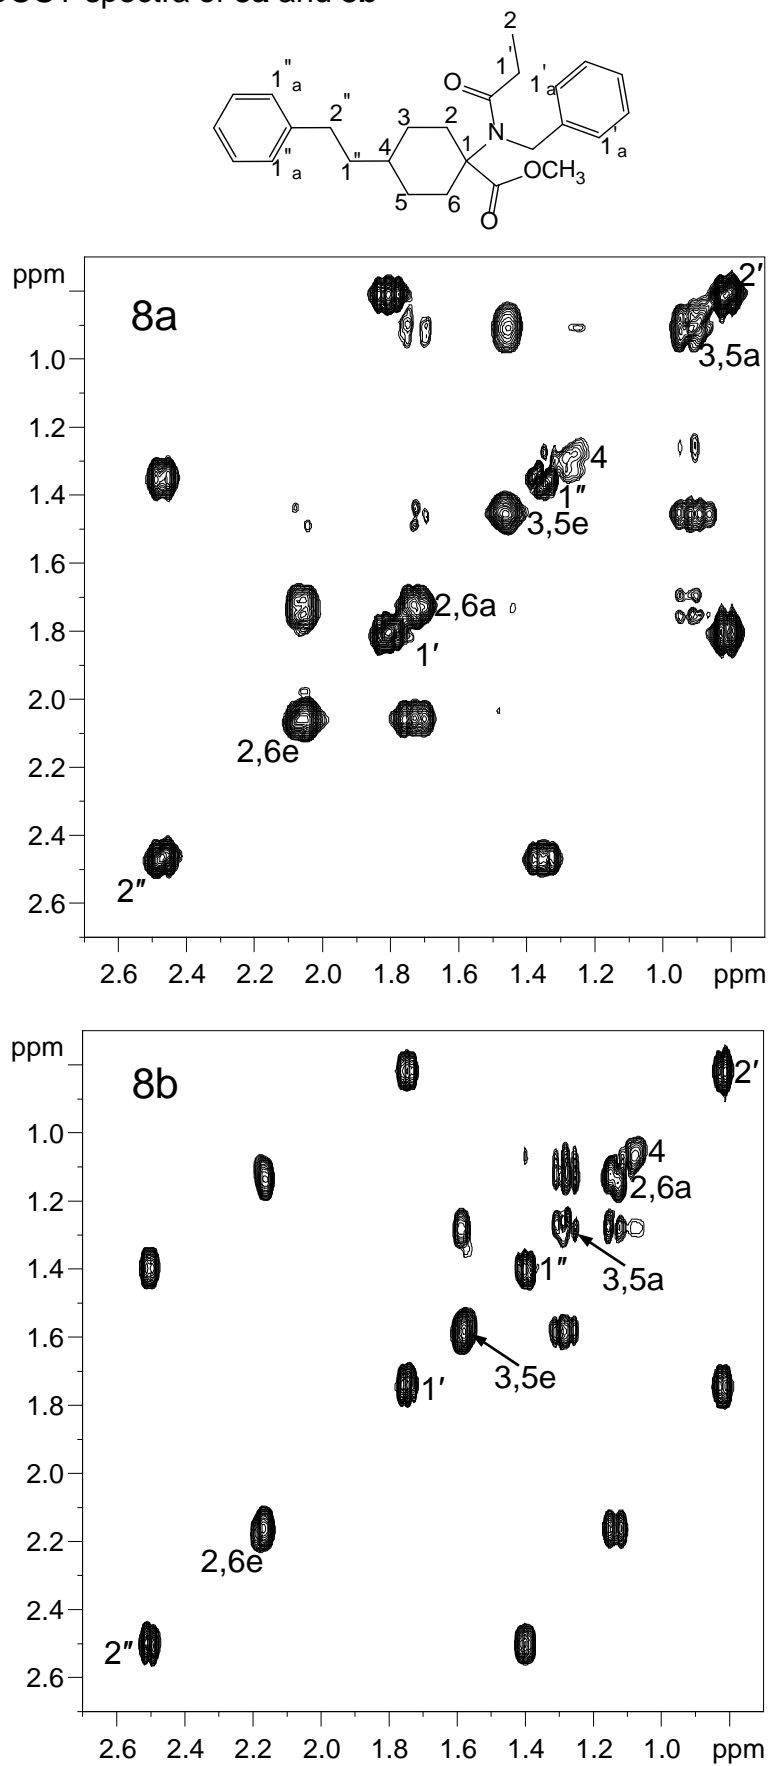

Figure 3.  $^1\text{H}$ - $^{13}\text{C}$  HSQC spectra of **8a** and **8b**

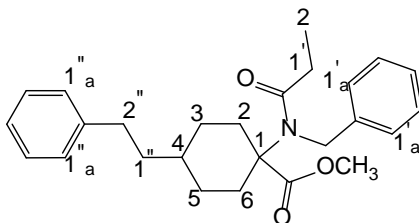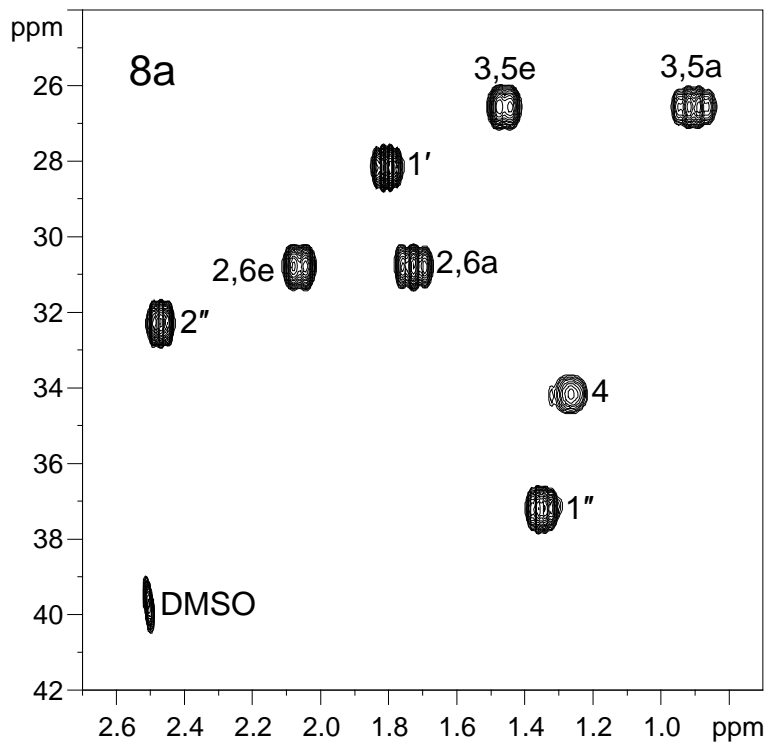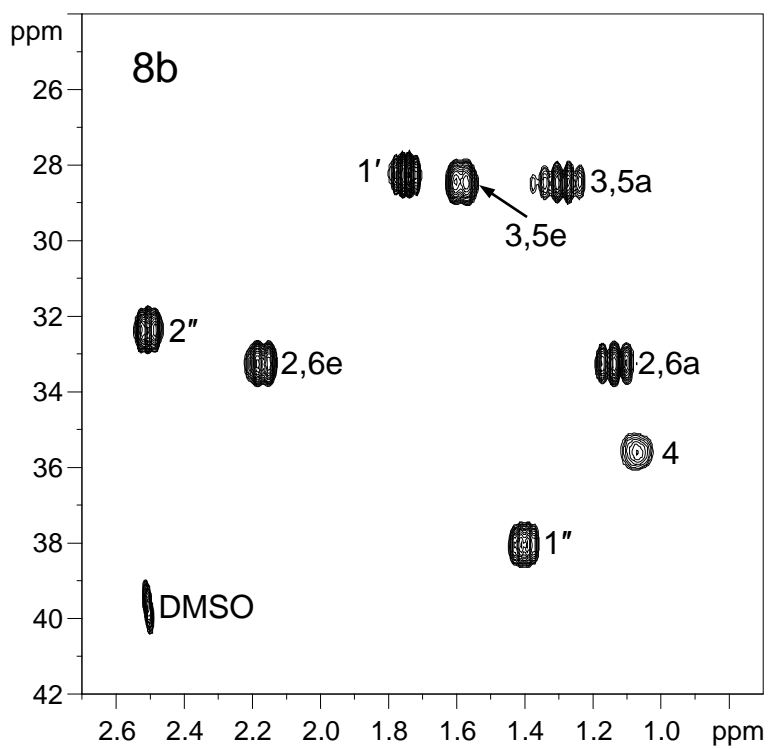

Figure 4.  $^1\text{H}$ - $^1\text{H}$  NOESY spectra of **8a** and **8b**

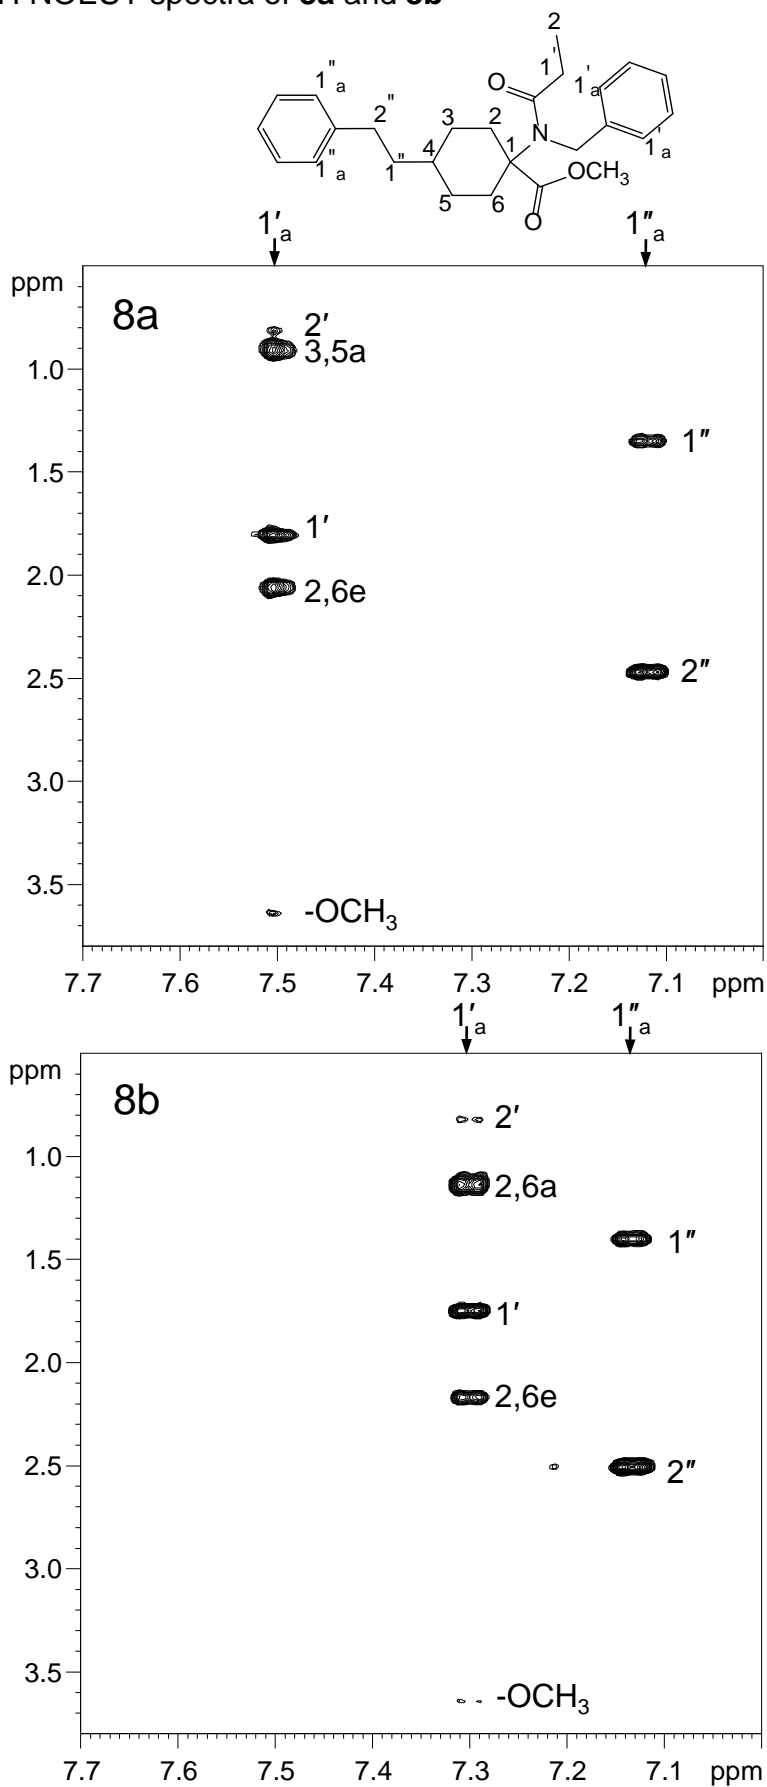

Supplement: NIHMS617901-supplement-01.pdf [file NIHMS617901-supplement-01.pdf]
